# Supplementary material for: Effect of non-adhering dressings on promotion of fibroblast proliferation and wound healing in vitro
Source: PubMed Central journal article supplement (PMC6416289; doi:10.1038/s41598-019-40921-y), 2019-03-13

## Supplementary Material

### Effect of non-adhering dressings on promotion of fibroblast proliferation and wound healing *in vitro*

Cornelia Wiegand<sup>1,\*</sup>, Martin Abel<sup>2</sup>, Uta-Christina Hipler<sup>1</sup>, Peter Elsner<sup>1</sup>

<sup>1</sup>Department of Dermatology, University Hospital Jena, Germany

<sup>2</sup>Lohmann & Rauscher GmbH & Co. KG, Neuwied, Germany

\*Corresponding author: Cornelia Wiegand, Department of Dermatology, University Hospital Jena, Erfurter Straße 35, 07740 Jena, Germany, Email: C.Wiegand@med.uni-jena.de, Tel. +49 3641 937584, Fax +49 3641 937437

**Supplement figure S1:** Determination of direct effect of the different non-adhering dressings on fibroblast viability over time was verified by measurement of viable cells using the luminometric ATP assay. Data presented as mean  $\pm$  standard deviation (n = 4). Asterisks indicate significant deviations from the untreated control (\* p < 0.05, \*\* p < 0.01, \*\*\* p < 0.001).

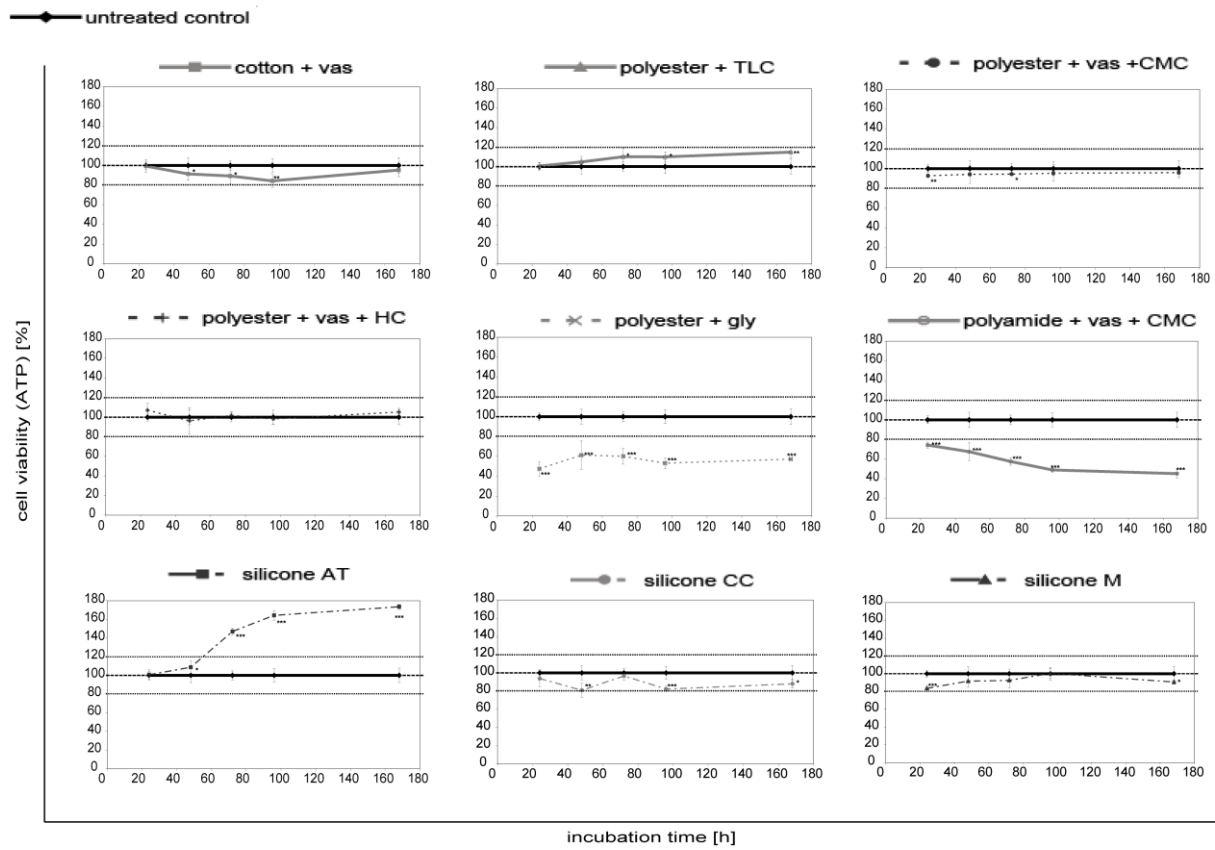

**Supplement figure S2:** Cell quantification was carried out using the MTT test for verification of analysis of the effect of the extracts of the non-adhering dressings on fibroblast proliferation over 72 hours. Data presented as mean  $\pm$  standard deviation (n = 4). Asterisks indicate significant deviations from the untreated control (\* p < 0.05, \*\* p < 0.01, \*\*\* p < 0.001).

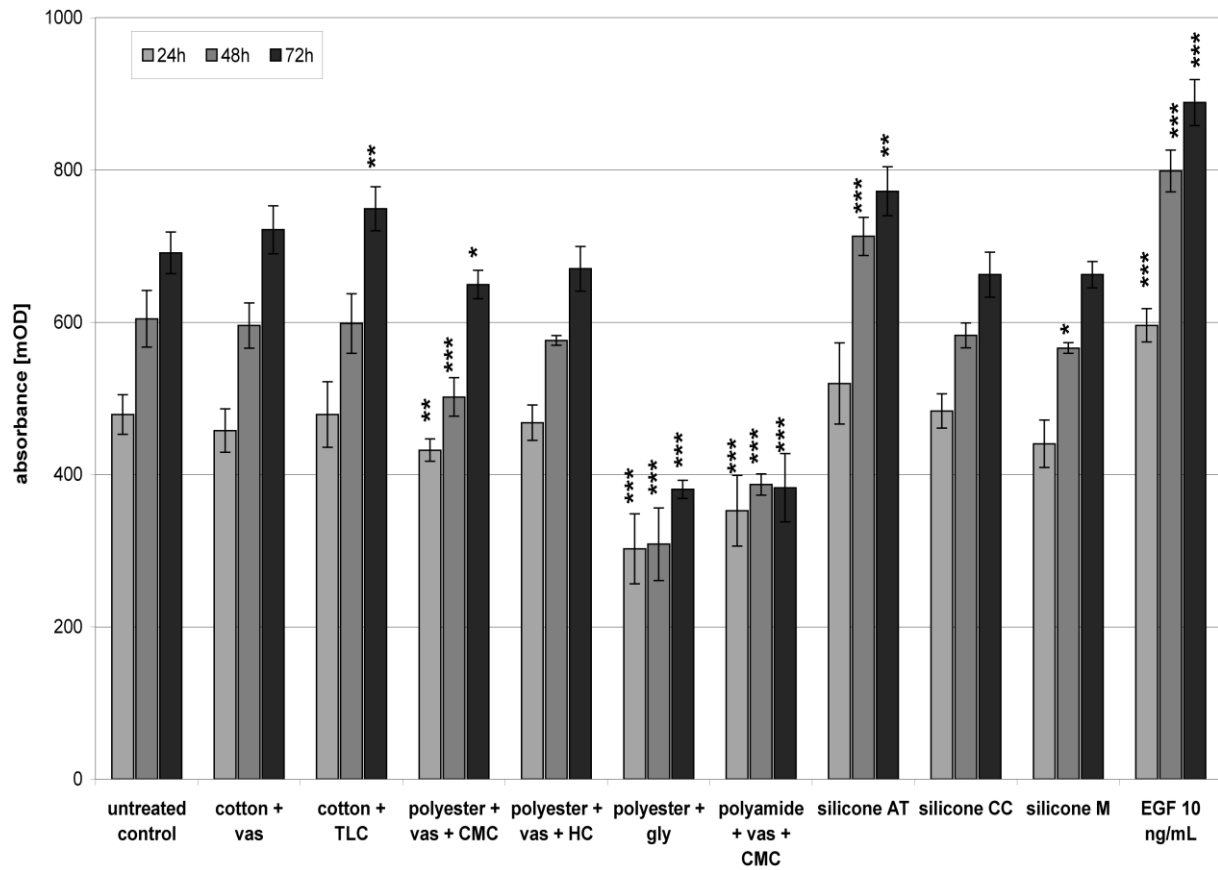

Supplement: 41598_2019_40921_MOESM1_ESM.pdf [file 41598_2019_40921_MOESM1_ESM.pdf]
